# Supplementary material
Source: Royal Society of Chemistry journal article supplement (doi:10.1039/d6sm00210b)
Supplement: d6sm00210b1.pdf [file d6sm00210b1.pdf]

## Supporting information

### Effect of methoxy substituent on self-assembly and gelation performance of benzamide-based organogelators

Qian-Ru Li <sup>a, b</sup>, Lu Xing <sup>a, b</sup>, Hui Li <sup>a, b</sup>, Yong-Le Dou <sup>a, b</sup>, Xiu Yue <sup>a, b</sup>, Akram Yasin <sup>a, b\*</sup>, Peng-Cheng Ma <sup>a, b\*</sup>

<sup>a</sup> Xinjiang Key Laboratory of Separation Material and Technology, The Xinjiang Technical Institute of Physics and Chemistry, Chinese Academy of Sciences, Urumqi 830011, China.

<sup>b</sup> Center of Materials Science and Optoelectronics Engineering, University of Chinese Academy of Sciences, Beijing 100049, China.

\* Corresponding author. Tel: +86-991-6992225; E-mail: [akram@ms.xjb.ac.cn](mailto:akram@ms.xjb.ac.cn) (A. Yasin), E-mail: [mapc@ms.xjb.ac.cn](mailto:mapc@ms.xjb.ac.cn) (P.C. Ma).

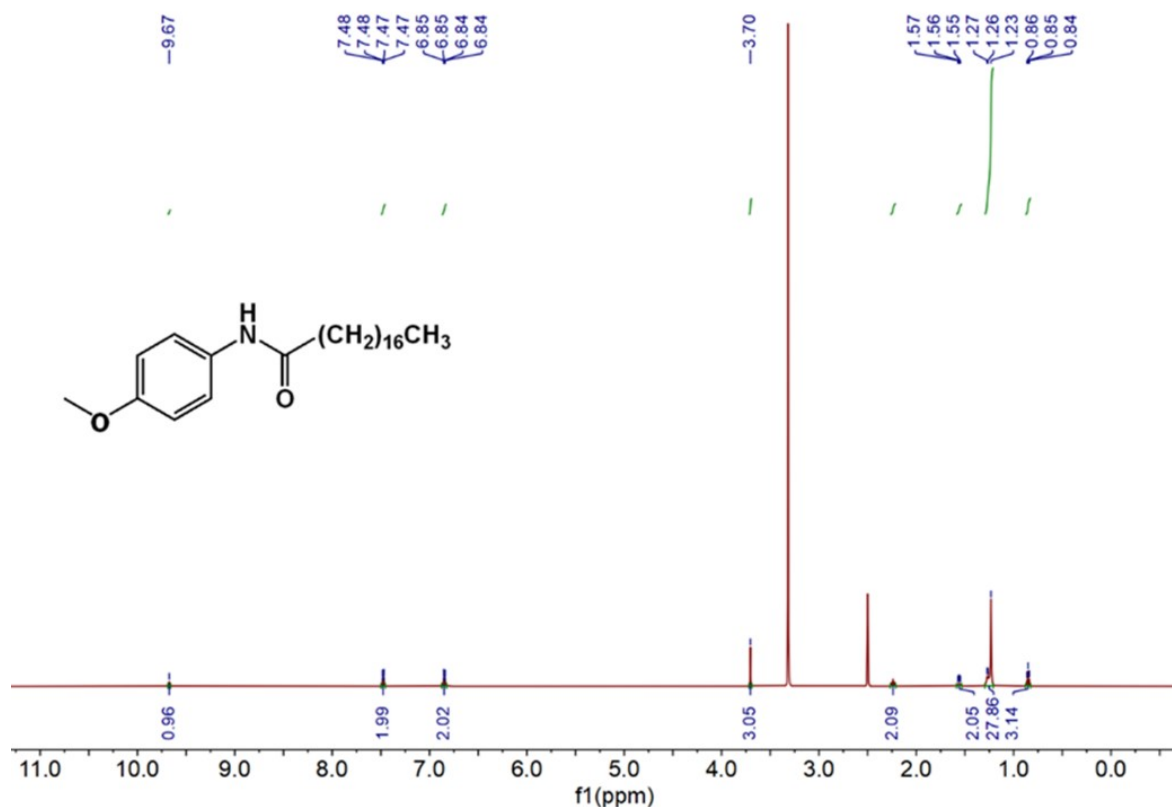

Figure S1. <sup>1</sup>H NMR spectrum of G1 (DMSO-d<sub>6</sub>).

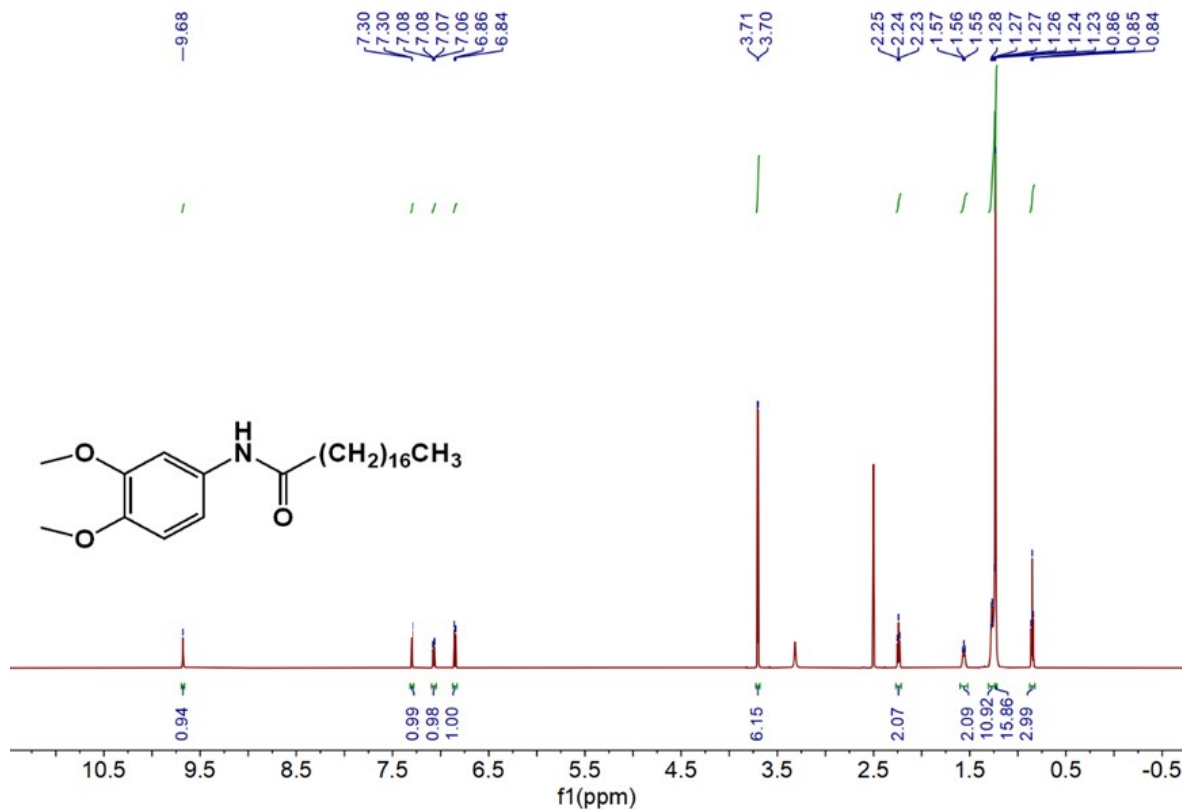

Figure S2. <sup>1</sup>H NMR spectrum of G2.

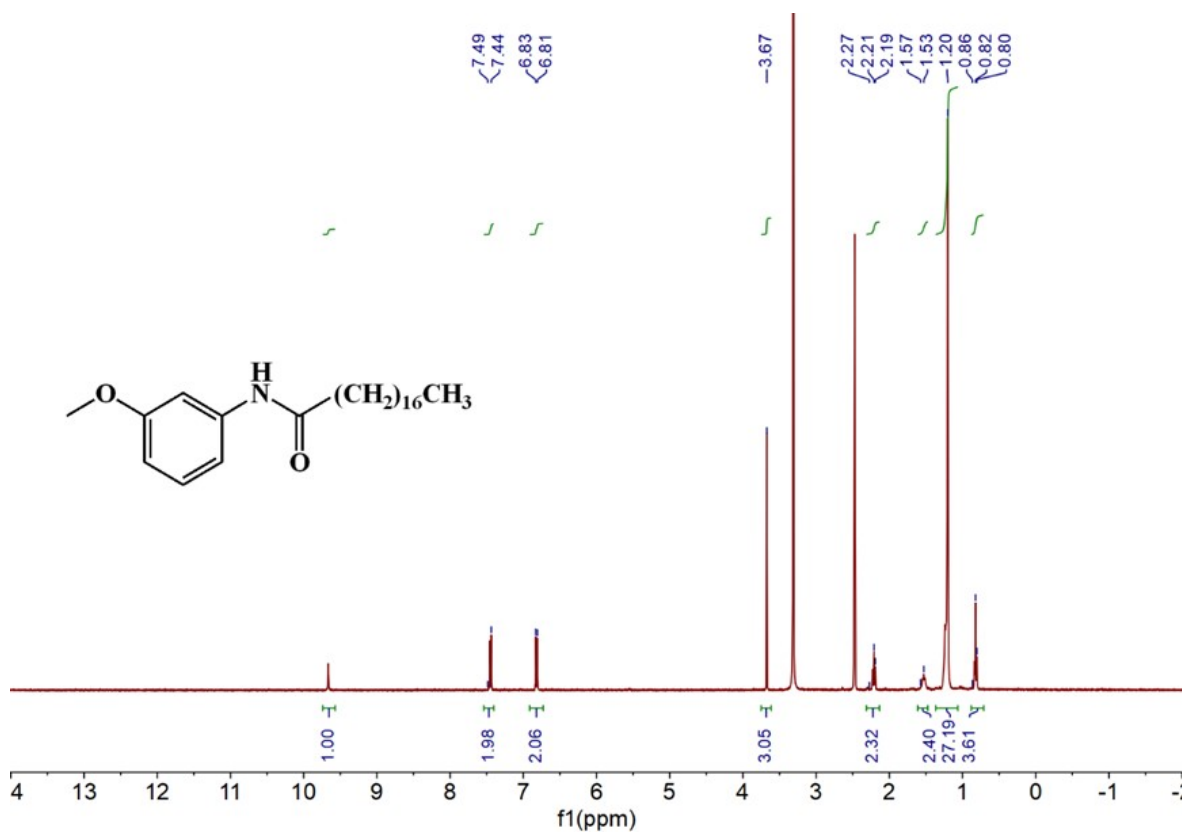

Figure S3. <sup>1</sup>H NMR spectrum of C1 (DMSO-d<sub>6</sub>).

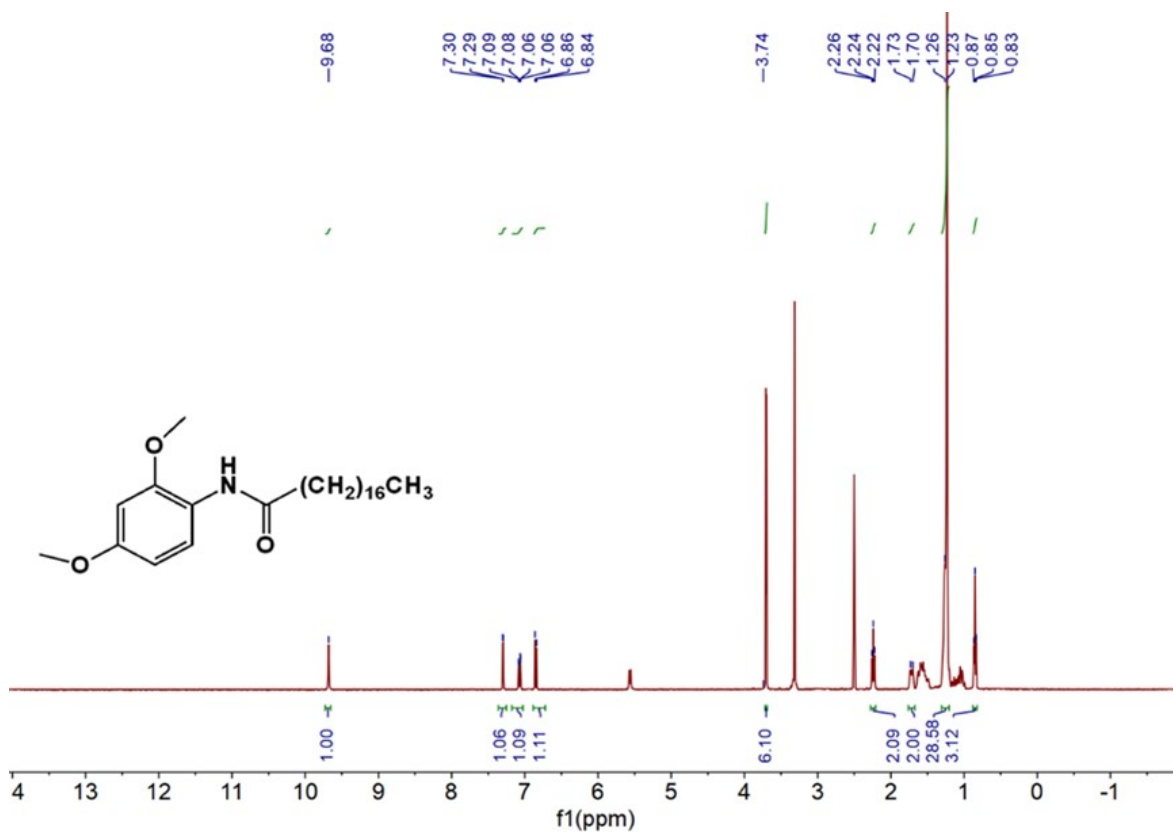

Figure S4. <sup>1</sup>H NMR spectrum of C2 (DMSO-d<sub>6</sub>).
